# Supplementary material for: Assessing Associations Between COVID-19 Symptomology and Adverse Outcomes After Piloting Crowdsourced Data Collection: Cross-sectional Survey Study
Source: JMIR Form Res. 2022 Dec 6;6(12):e37507. doi: 10.2196/37507 (PMC9746676; doi:10.2196/37507)
Supplement: Multimedia Appendix 1 [file formative_v6i12e37507_app1.docx]

**Multimedia Appendix 1.** Individual survey of COVID-19 symptoms.

1. What type of COVID-19 test did you take? **(Select all that apply)**

- Nasopharyngeal swab (Nasal)
- Oropharyngeal swab (Throat)
- Blood test
- Saliva test (sputum)
- Urine test
- I did not get tested
- Other ________________________________________________

2. Are you 18 years or older?

- Yes
- No

3. Please select the symptoms you experienced following a Covid-19 infection **(Select all that apply)**1

*NOTE:* ***No symptoms****should be selected if none were present*

- Abdominal pain
- Bladder pain
- Chest discomfort, tightness or pressure
- Chills
- Confusion
- Cough with sputum
- Cramping legs
- Diarrhea
- Dizziness
- Dry Cough
- Dry skin
- Dry eyes
- Fever > 100.4 F or > 38 C
- Fever but do not know exact temperature (no thermometer)
- General lack of energy or malaise
- Headaches
- Hair Loss
- Hoarseness
- Joint aches
- Loss of ability to smell
- Loss of ability to taste
- Loss of appetite
- Muscle aches
- Nausea
- Rhinorrhea
- Runny or stuffy nose
- Seizure
- Shortness of breath
- Skin rash
- Sneezing
- Sore throat
- Sputum production
- Stomach cramps
- Tiredness or Fatigue
- Vomiting
- Weakness
- Altered consciousness or feeling like it was difficult to stay awake
- Other symptoms ________________________________________________
- **No Symptoms**

4. Of all the symptoms you reported, **which one symptom was the most bothersome** (i.e., severe) to you?1

- Abdominal pain
- Bladder pain
- Chest discomfort, tightness or pressure
- Chills
- Confusion
- Cough with sputum
- Cramping legs
- Diarrhea
- Dizziness
- Dry Cough
- Dry skin
- Dry eyes
- Fever > 100.4 F or > 38 C
- Fever but do not know exact temperature (no thermometer)
- General lack of energy or malaise
- Headaches
- Hair Loss
- Hoarseness
- Joint aches
- Loss of ability to smell
- Loss of ability to taste
- Loss of appetite
- Muscle aches
- Nausea
- Rhinorrhea
- Runny or stuffy nose
- Seizure
- Shortness of breath
- Skin rash
- Sneezing
- Sore throat
- Sputum production
- Stomach cramps
- Tiredness or Fatigue
- Vomiting
- Weakness
- Altered consciousness or feeling like it was difficult to stay awake
- Other symptom_______________________________________________

5. How bothersome or distressful was that symptom?1

- Not at all
- A little bit
- Somewhat
- Quite a bit
- Very much

6. Have you been hospitalized for COVID-19 or because you had difficulty breathing or a respiratory infection?1

- Yes
- No

7. How many days have you been hospitalized?

- 1-2 days
- 3-4 days
- 5-6 days
- 7-10 days
- 11-15 days
- more than 15 days

8. Have you been connected to a ventilator machine due to respiratory failure?

- Yes
- No

9. What is your status now?1

- You recovered and are symptom free
- You are feeling better but not completely recovered
- You are not feeling better

10. Do you smoke tobacco products (e.g., cigarettes, cigars, pipes)?

- Yes, every day
- Yes, some days
- Past smoker, I quit less than a year ago
- Past smoker, I quit more than a year ago
- Never smoked on permanent basis

11. Have you had a flu vaccine this season?

- Yes
- No

12. Have you had a tuberculosis vaccine within the past 10 years?

- Yes
- No
- Do not remember

13. Do not answer this question (Please click “NEXT” to go to the next question)

- Yes
- Maybe
- No

14. Have you EVER been told by a doctor or other health professional that you have any of the following medical conditions?2(**Select all that apply)**
*NOTE:* ***None*** *should be selected if none of the listed conditions were ever present*

- Alcohol or substance use disorder
- Anemia
- Asthma
- Autoimmune problems
- Bladder Problems
- Bleeding Disease (Coagulopathy)
- Bowel Disease
- Cancer
- Cardiac arrhythmia
- Chronic kidney disease
- Chronic obstructive pulmonary disease (COPD)
- Congestive heart failure
- Depression
- Diabetes, uncomplicated
- Diabetes, complicated
- Drug abuse
- Heart Pain/Angina
- Hepatitis B virus (HBV)
- Hepatitis C virus (HCV)
- High Blood Pressure
- High Cholesterol
- HIV
- Hypertension
- Lung/Respiratory Disease
- Mental Illness
- Migraines
- Obesity
- Osteoporosis
- Psychoses
- Paralysis
- Other neurological disorders
- Reflux/GERD
- Renal failure
- Seizures/Convulsions
- Severe Allergy
- Stroke/CVA of the Brain
- Thyroid Problems
- Tuberculosis (TB)
- Ulcer
- Valvular heart disease
- Weight loss
- Other mental health condition___________________________
- Other chronic condition_________________________________
- None

[The following question will only show when certain conditions are selected]

What type of cancer do you have? (**Select all that apply)**

- Blood (Leukemia)
- Breast
- Colon
- Lung
- Lymphoma
- Pancreas
- Prostate
- Skin (Melanoma)
- Other________________________________________________

Please specify the cancer status:

- Ongoing
- Past
- Recent Remission

Please specify the status of Lung/Respiratory Disease

- Past
- Current

Please specify the status of Hepatitis C virus (HCV)

- Past
- Current

Please specify the status of Asthma

- Past
- Current

Please specify the status of Cardiac arrhythmia

- Past
- Current

Please specify the status of Heart Pain/Angina

- Past
- Current

[End of question 14]

15. Are you currently taking any medications for any of **these conditions**?2

- Yes
- No

16. Are you currently taking any medications for **any other** health or medical conditions?2

- Yes
- No

17. Please list which medications you are taking regularly

________________________________________________________________

________________________________________________________________

________________________________________________________________

18. Have you made arrangements to get your medication refill/s?2

- No
- You have been able to arrange for some medication refills but not all
- You are waiting to hear from your physician on how to refill medications
- Yes, home delivery
- Yes, you will be picking up from the pharmacy
- Yes, someone will be picking up your medications for you

19. Since the COVID-19 pandemic (March 1, 2020), have you needed to postpone any medical procedures?2

- Yes
- No

20. In the past month, have you missed any scheduled appointments with any health care provider?2

- Yes
- No
- Don't know
- Refused to answer

21. In the past month, have you missed taking any medications?2

- Yes
- No
- Don't know
- Refused to answer

22. What sex were you assigned at birth, on your original birth certificate?3

- Male
- Female

23. What is your age?

________________________________________________________________

24. What is your race?3 (**Select all that apply**)

- White
- Black/African American
- Asian American
- Native American/American Indian or Alaska Native
- Native Hawaiian or other Pacific Islander
- Other

25. What is your ethnicity?3

- Hispanic or Latino
- Not Hispanic or Latino

26. What was your income last year (in 2019) from all sources before taxes?3
 This includes all income from both formal and informal employment.
 Answers show both monthly and yearly incomes. (Choose one)

- Monthly income: $0 to $833; Yearly income: $0 to $9,999
- Monthly income: $834 to $1,250; Yearly income: $10,000 to $14,499
- Monthly income: $1,251 to $2,082; Yearly income: $15,000 to $24,999
- Monthly income: $2,083 to $2,916; Yearly income: $25,000 to $34,999
- Monthly income: $2,917 to $4,167; Yearly income: $35,000 to $49,999
- Monthly income: $4,168 to $6,249; Yearly income: $50,000 to $74,999
- Monthly income: $6,250 or more; Yearly income: $75,000 or more
- Don't know
- Refuse to Answer

27. What is the highest level of education you completed?3

- Never attended school
- Grades 1 through 8
- Grades 9 through 11 / Some high school
- Grade 12/Completed high school or GED
- Some college, Associates Degree, or Technical Degree
- Bachelor's Degree
- Any post graduate studies
- Don't Know
- Refuse to Answer

Citations:

1. COVID-19 COMMUNITY RESPONSE SURVEY GUIDANCE - Modul 4: COVID-19 Symptoms and Testing Experience
2. COVID-19 COMMUNITY RESPONSE SURVEY GUIDANCE - Modul 5: Comorbidities and Care Engagement
3. COVID-19 COMMUNITY RESPONSE SURVEY GUIDANCE - Modul1: Demographics

https://www.phenxtoolkit.org/toolkit_content/PDF/JHU_C4WARD.pdf
